# Supplementary material
Source: ML conference proceedings conference paper supplement (https://proceedings.neurips.cc/paper_files/paper/2020/hash/eccd2a86bae4728b38627162ba297828-Abstract.html)
Supplement: Supplementary file [file eccd2a86bae4728b38627162ba297828-Supplemental.pdf]

## A Supplementary Material

### A.1 Proofs

**Proposition 1.** *Let  $\langle l_1, \dots, l_n \rangle$  represent indices  $\mathcal{E}$  sorted by non-increasing value of  $\delta_j$ . Pick  $k$  such that  $\sum_{j \in \{l_1, \dots, l_k\}} \delta_j > \Phi$  and  $\sum_{j \in \{l_1, \dots, l_{k-1}\}} \delta_j \leq \Phi$ . Then (12) holds for  $\mathcal{P} = \{l_r | 1 \leq r \leq k\}$ , and  $\mathcal{P}$  represents an optimal solution of (16).*

*Proof.* We prove that an optimal solution to (16) can be obtained with the greedy algorithm that picks features in non-increasing order of  $\delta_j$ 's. Let  $\mathcal{P}^* = \langle i_1, \dots, i_k \rangle$  denote the  $k$  indices in some optimal solution, such that  $\delta_{i_1} \geq \dots \geq \delta_{i_k}$ . Moreover, let  $\mathbb{V}(\mathcal{P}^*) = \sum_{j \in \{i_1, \dots, i_k\}} \delta_j$ . Clearly,  $\mathbb{V}(\mathcal{P}^*) > \Phi$ ; otherwise  $\mathcal{P}^*$  would not satisfy the constraint in (16).

We prove by induction that one can construct another optimal solution  $\mathcal{P} = \langle l_1, \dots, l_k \rangle$ , where  $l_1, \dots, l_k$  denote the first  $k$  features with highest  $\delta_j$ . For the base case, we consider the first pick, and suppose that  $i_1 \neq l_1$  (and so  $l_1$  does not occur in  $\mathcal{P}^*$ ). We can construct another sequence  $\mathcal{P}' = \langle l_1, i_2, \dots, i_k \rangle$ , such that  $\mathbb{V}(\mathcal{P}') = \sum_{j \in \{l_1, i_2, \dots, i_k\}} \delta_j \geq \mathbb{V}(\mathcal{P}^*) > \Phi$ . Hence,  $\mathcal{P}'$  is still an optimal solution, and starts with a greedy choice. For the general case, we assume that the first  $r-1$  picks can be made to respect the greedy choice, and that the  $r^{\text{th}}$  does not. The reasoning now can be mimicked again, and so we can construct another optimal solution such that the  $r^{\text{th}}$  choice is also greedy. Thus, Proposition 1 yields a smallest PI-explanation.  $\square$

**Proposition 2.** *PI-explanations of an XLC can be enumerated with log-linear delay.*

*Proof.* For simplicity of presentation, we assume that the values  $\delta_i$  are sorted in non-increasing order, i.e.  $\delta_1 \geq \dots \geq \delta_n$ . This sorting operation can be achieved in log-linear time. Recall that  $\delta_i \geq 0$  ( $i = 1, \dots, n$ ) and that a PI-explanation represented by the bit vector  $p$  must satisfy the two constraints: (C1)  $\sum_{i=1}^n \delta_i p_i > \Phi$  and (C2)  $\forall j \in \{1, \dots, n\}$  such that  $p_j = 1$ ,  $(\sum_{i=1}^n \delta_i p_i) - \delta_j p_j \leq \Phi$  (subset-minimality).

Consider an exhaustive depth-first binary search (DFS) in which at depth  $r$  the two branches correspond to  $p_r = 1$  and  $p_r = 0$ . It is critical for the correctness of this search that on each branch, the  $p_i$  variables are instantiated in non-increasing order of the corresponding values  $\delta_i$ . For a depth- $r$  node  $\alpha$  of this search tree, let  $S_\alpha$  be the sum  $\sum_{i=1}^r \delta_i p_i$ . A node  $\alpha$  is declared a leaf (and is hence not expanded) if  $S_\alpha > \Phi$ . Assuming that, by default, the remaining values  $\delta_{r+1}, \dots, \delta_n$  are assigned 0, node  $\alpha$  satisfies (C1). Clearly, any other descendant nodes (at which at least one of  $\delta_{r+1}, \dots, \delta_n$  is 1) would not satisfy (C2) and hence does not need to be considered. This means that all PI-explanations will be found. It remains to show that all leaves  $\alpha$  satisfy subset-minimality and hence are PI-explanations. To see that  $\alpha$  satisfies (C2), let  $\beta$  be its parent node. Since  $\beta$  is not a leaf, we must have  $S_\beta = S_\alpha - \delta_r p_r \leq \Phi$ . But then  $S_\alpha - \delta_j p_j \leq \Phi$  for all  $j$  such that  $p_j = 1$  since  $\delta_j \geq \delta_r$  ( $j = 1, \dots, r-1$ ). Thus, all leaves correspond to PI-explanations.

We add to our DFS the pruning rule that a depth- $r$  node  $\alpha$  is only created if  $S_\alpha + \sum_{i=r+1}^n \delta_i > \Phi$ . This sum is calculated incrementally, so only requires  $O(1)$  time at each node. The reason behind this rule is that if it is not satisfied, then no descendant of  $\alpha$  can satisfy (C1). On the other hand, if this rule is satisfied then we know that at least one descendant of  $\alpha$  will be a leaf (and as explained above will correspond to a PI-explanation). It is well known that a depth-first search in a search tree with no dead-end nodes provides a polynomial delay algorithm [4]. In our DFS, the delay between visiting two leaves is linear in  $n$ . Since finding the first PI-explanation also requires a sorting step, with a log-linear complexity, we can conclude that the worst-case delay is log-linear.  $\square$

## A.2 Additional Plots

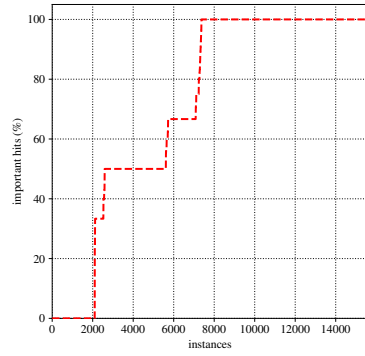

(a) Anchor

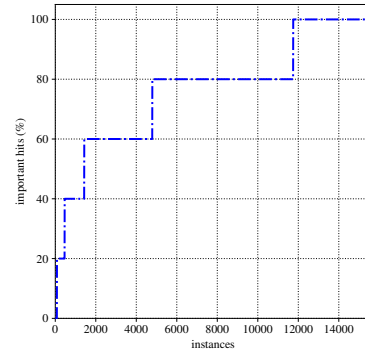

(b) SHAP

Figure 5: Percentage of important “hits” of explanations produced by Anchor and SHAP.
